# Supplementary material
Source: HighWire-hosted journal article supplement (https://bmjopensem.bmj.com/content/suppl/2021/01/13/7.1.e000935)
Supplement: bmjsem-2020-000935supp001_data_supplement.pdf [file bmjsem-2020-000935supp001_data_supplement.pdf]

## Appendix 1: Boolean Terms

## Medline:

("curcuma"[MeSH Terms] OR "curcuma"[All Fields] OR "turmeric"[All Fields]) OR  
 (("curcumin"[MeSH Terms] OR "curcumin"[All Fields]) AND extract[All Fields] AND  
 ("osteoarthritis, knee"[MeSH Terms] OR ("osteoarthritis"[All Fields] AND "knee"[All Fields])  
 OR "knee osteoarthritis"[All Fields] OR ("knee"[All Fields] AND "osteoarthritis"[All Fields])))

## Embase:

('curcumin extract' OR (('curcumin'/exp OR curcumin) AND ('extract'/exp OR extract)) OR  
 'turmeric'/exp OR turmeric) AND ('knee osteoarthritis'/exp OR 'knee osteoarthritis' OR  
 (('knee'/exp OR knee) AND ('osteoarthritis'/exp OR osteoarthritis))) AND ('clinical trial'/de OR  
 'controlled clinical trial'/de OR 'controlled study'/de OR 'double blind procedure'/de OR 'human'/de  
 OR 'in vivo study'/de OR 'randomized controlled trial'/de OR 'single blind procedure'/de) AND  
 ('arthritis'/dm OR 'joint stiffness'/dm OR 'knee osteoarthritis'/dm OR 'knee pain'/dm OR  
 'osteoarthritis'/dm OR 'pain'/dm) AND ('curcuma domestica extract'/dd OR 'curcuma longa  
 extract'/dd OR 'curcumin'/dd OR 'nonsteroid antiinflammatory agent'/dd OR 'placebo'/dd OR 'plant  
 extract'/dd OR 'turmeric'/dd OR 'unclassified drug'/dd OR 'unindexed drug'/dd)

CINHL: "( turmeric and knee osteoarthritis ) OR ( ( Osteoarthritis, Kne OR Knee OR Knee Joint  
 OR knee ORknees AND Osteoarthritis OR osteoarthros\* OR osteoarthros\* ORosteoarthrit\* OR ( osteoarthros\* OR osteoarthrit ) AND Curcumin extract OR turmeric OR Curcumin longa OR ( Curcumin and knee osteoarthritis ) ) AND ( Clinical Trial or clinical study ) AND randomized

controlled trials OR randomized controlled trials AND double blind study AND human AND no animal testing ) AND not systematic review AND randomi\* control\* trial\* )
